# Supplementary material for: Multiple environmental stressors induce complex transcriptomic responses indicative of phenotypic outcomes in Western fence lizard
Source: BMC Genomics. 2018 Dec 5;19:877. doi: 10.1186/s12864-018-5270-0 (PMC6282355; doi:10.1186/s12864-018-5270-0)
Supplement: Supplementary file 2 — Figures. Include additional graphics in support of the main manuscript and are provided in the file. (DOCX 2097 kb) [file 12864_2018_5270_MOESM2_ESM.docx]

**Supplementary Figures**

**Title: Multiple Environmental Stressors Induce Complex Transcriptomic Responses Indicative of Phenotypic Outcomes in Western Fence Lizard**

**Authors:** Kurt A. Gusta*, Vijender Chaitankarb, Preetam Ghoshc,Mitchell S. Wilbanksa Xianfeng Chend, Natalie D. Barkere, Don Phamf,g,Leona D. Scanlanf,h, Arun Rawati, Larry G. Talentj, Michael J. Quinn Jr.k, Christopher D. Vulpel, Mohamed O. Elasrim, Mark S. Johnsonk, Edward J. Perkinsa, Craig A. McFarlandk

aU.S. Army Engineer Research and Development Center, Environmental Laboratory, Vicksburg, MS, USA 39180. [kurt.a.gust@usace.army.mil](mailto:kurt.a.gust@usace.army.mil), [mitchell.s.wilbanks@usace.army.mil](mailto:mitchell.s.wilbanks@usace.army.mil), [edward.j.perkins@erdc.dren.mil](mailto:edward.j.perkins@erdc.dren.mil)

bNational Institute of Health - National Heart, Lung, and Blood Institute, Bethesda, MD, USA 20892. [vijender.chaitankar@nih.gov](mailto:vijender.chaitankar@nih.gov).

cVirginia Commonwealth University, School of Engineering, Richmond, VA, USA 23284. [pghosh@vcu.edu](mailto:pghosh@vcu.edu)

dIFXworks LLC, 2915 Columbia Pike, Arlington, VA 22204, USA. [xianfeng.chen@ifxworks.com](mailto:xianfeng.chen@ifxworks.com)

eBennett Aerospace, Cary, NC 27511, USA. [natalie.d.barker@usace.army.mil](mailto:natalie.d.barker@usace.army.mil)

fDepartment of Nutritional Sciences and Toxicology, University of California Berkeley, Berkeley, California 94720

g(Current Affiliation) Carlsbad Unified School District, Carlsbad, CA, USA 92009. [donquypham@gmail.com](mailto:donquypham@gmail.com)

h(Current Affiliation) California Environmental Protection Agency, Department of Pesticide Regulation, Sacramento, CA, USA 95812. Scanlan.Leona@gmail.com

iSidra Medicine, Education City (North Campus), Doha, Qatar 26999. [rawat.arun@gmail.com](mailto:rawat.arun@gmail.com)

jOklahoma State University, Department of Natural Resource Ecology and Management, Stillwater, OK, USA 74078. [larry.talent@okstate.edu](mailto:larry.talent@okstate.edu)

kU.S. Army Public Health Center, Aberdeen Proving Ground, MD, USA 21010. [michael.j.quinn104.civ@mail.mil](mailto:michael.j.quinn104.civ@mail.mil), [mark.s.johnson.civ@mail.mil](mailto:mark.s.johnson.civ@mail.mil), [craig.a.mcfarland.civ@mail.mil](mailto:craig.a.mcfarland.civ@mail.mil)

lUniversity of Florida, College of Veterinary Medicine, Gainesville, FL, USA 32610. [cvulpe@ufl.edu](mailto:cvulpe@ufl.edu)

mUniversity of Southern Mississippi, Department of Biological Sciences, Hattiesburg, MS, USA 39406-5018. [mohamed.elasri@usm.edu](mailto:mohamed.elasri@usm.edu)

*Corresponding Author: [kurt.a.gust@usace.army.mil](mailto:kurt.a.gust@usace.army.mil)

**Supplementary Figure S1.** Principal component analysis (PCA) of differentially expressed transcripts for exposures 1-3. PCA plots were developed for each primary stressor in each exposure.

**Supplemental Figure S2** (page 1 of 3). Heat maps and hierarchical clustering analyses for transcripts having significant differential expression in the treatment-interaction tests (1. TNT x Food Limitation, 2. Malaria x Food Limitation, and the 3. TNT x Malaria) identified by 2-way ANOVA.

**Supplemental Figure S2** cont. (page 2 of 3)

**Supplemental Figure S2** cont. (page 3 of 3)
